# Supplementary material for: Cuttlefish ink nanoparticles-integrated aerogel membranes for efficient solar steam generation
Source: Royal Society of Chemistry journal article supplement (doi:10.1039/d3su00301a), 2023-12-14
Supplement: d3su00301a1.pdf [file d3su00301a1.pdf]

## Supporting Information

### Cuttlefish Ink Nanoparticles-Integrated Aerogel Membranes for Efficient Solar Steam Generation

Yong Liu<sup>a\*</sup>, Ruyue Wang<sup>a</sup>, Kaiyuan Wang<sup>a</sup>, Fei Yang<sup>a</sup>, Yundi Chen<sup>a</sup>, Wenwen Xie<sup>a</sup>, Shengxu Luo<sup>a\*</sup>, Zhenyi Liang<sup>a</sup>, Qian Wang<sup>c\*</sup>, Juanjuan Li<sup>b\*</sup>

<sup>a</sup> School of Chemistry and Chemical Engineering, Hainan University, Haikou 570228, China

<sup>b</sup> School of Life Sciences, Hainan University, Haikou 570228, China

<sup>c</sup> College of Materials Science and Engineering, Taiyuan University of Technology, Taiyuan 030024, China

### Supplementary figures and tables

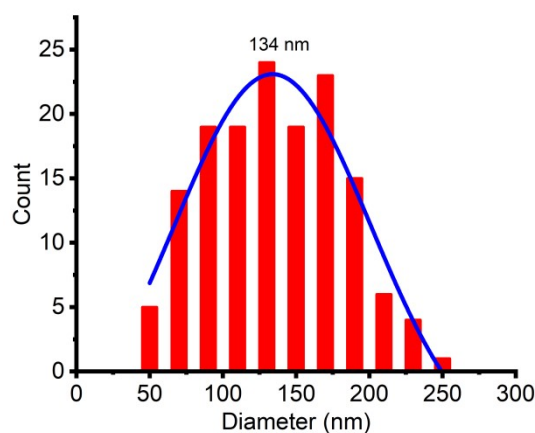

Figure S1. Size distribution of CFNPs measured by SEM.

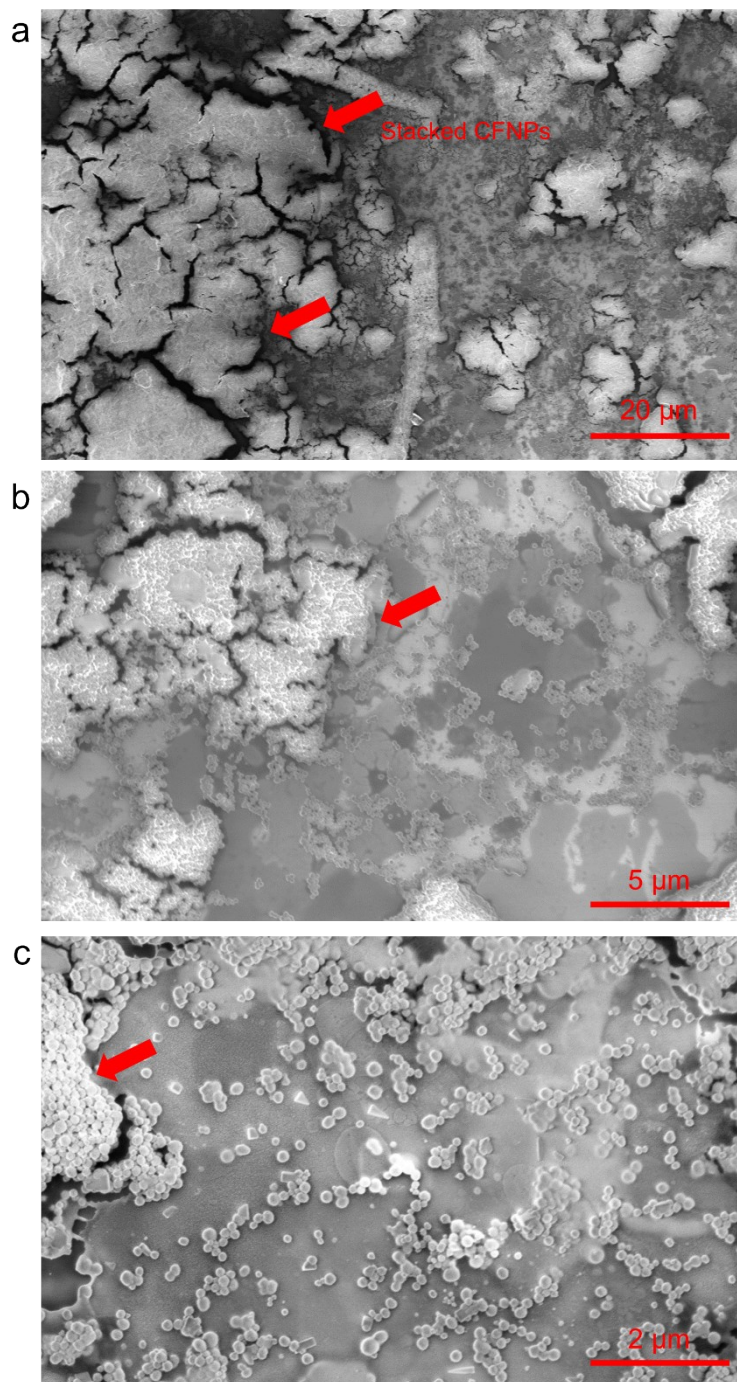

Figure S2. SEM images of unpurified cuttlefish ink under different magnifications. The red arrows indicate closely stacked CFNPs.

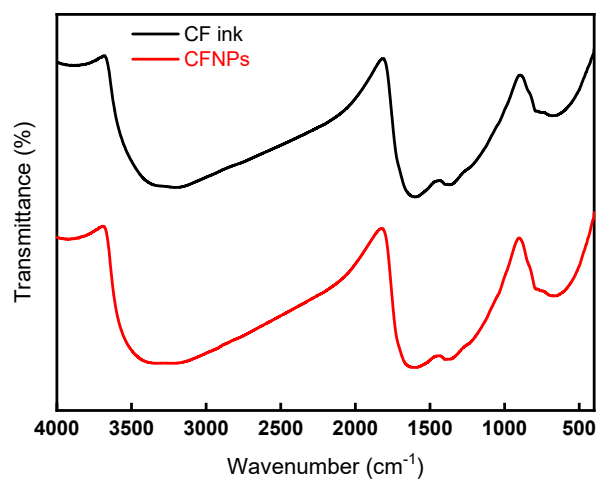

Figure S3. FTIR spectra of CF ink and CFNPs.

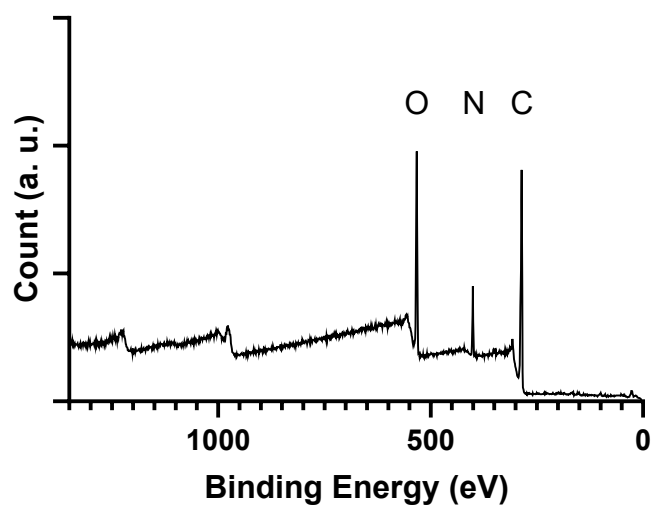

Figure S4. The XPS spectrum of CFNPs.

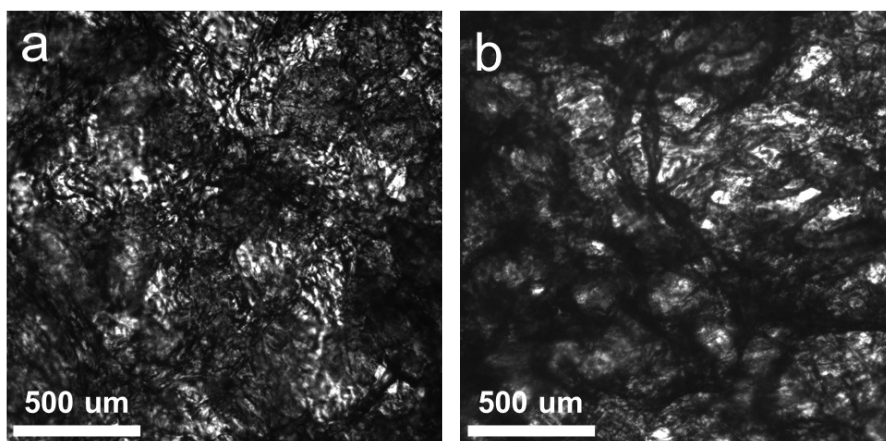

Figure S5. Optical images of aga (a) and CFNPs@Aga (b) aerogel membranes.

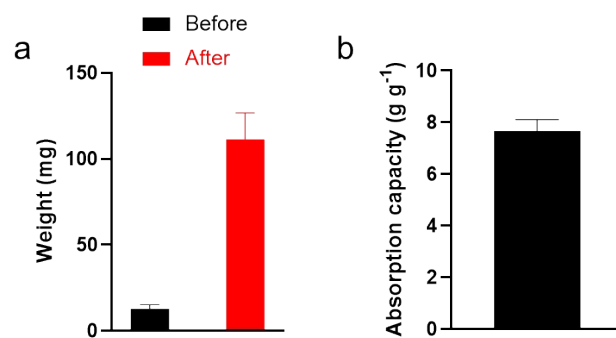

Figure S6. Water absorption capacity of the CFNPs@Aga aerogel. (a) The weight change before/after water absorption. (b) The calculated absorption capacity.

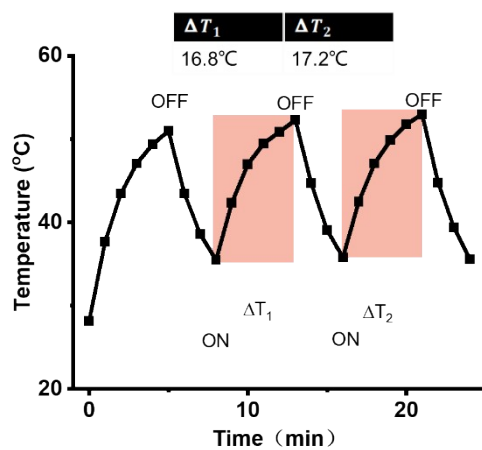

Figure S7. Photothermal stability of CFNPs during three on-off cycles.

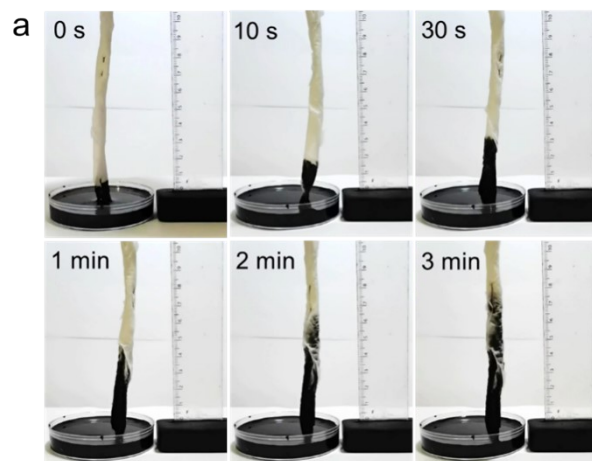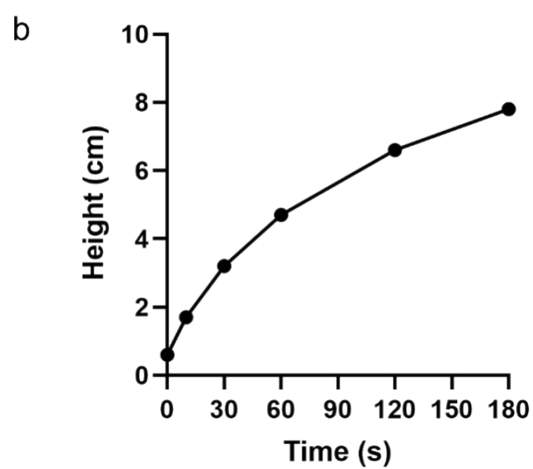

Figure S8. (a) Images of the paper string that can deliver water. (b) The height that water transports alongside the paper string in 3 min.

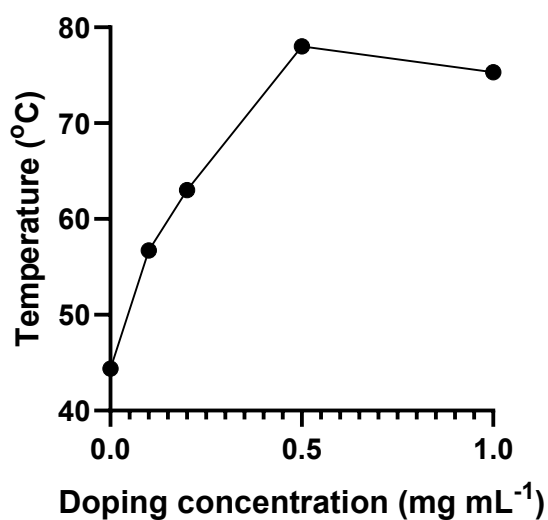

Figure S9. Surface temperature of the CFNPs@Aga membranes with different doping concentrations.

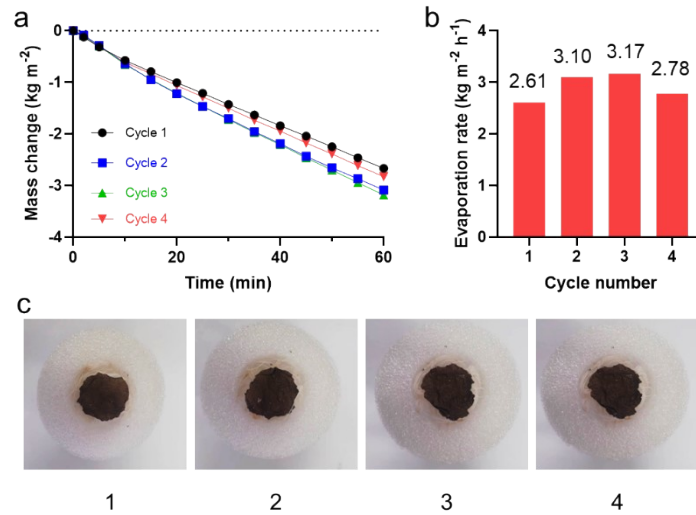

Figure S10. Durability of the CFNPs@Aga membrane in repeated use. (a-b) Evaporation rate of 5.0 wt% NaCl solution in four independent experiments using the same membrane. (c) Photographs of the aerogel membrane during repeated use.

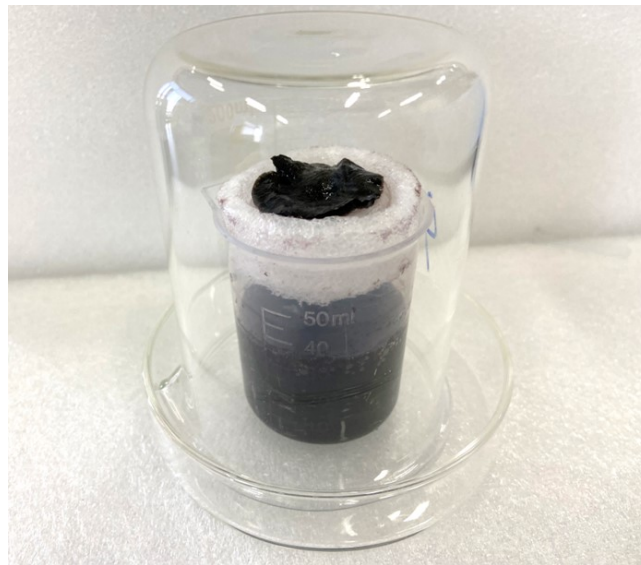

Figure S11. The experimental setup for freshwater obtainment.

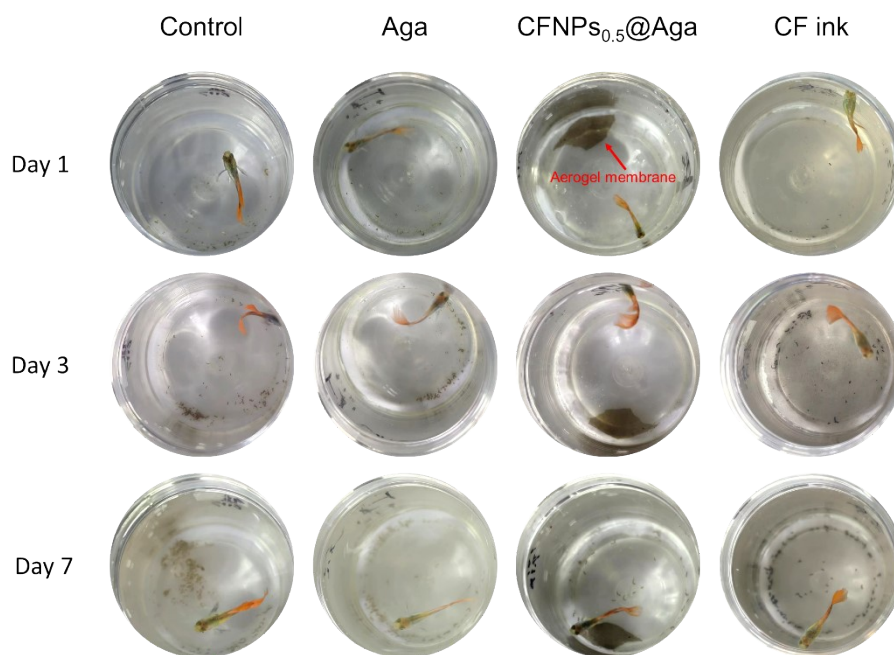

Figure S12. Aquatic toxicity of the aerogels and CFNPs to *poecilia reticulata*.

Table S1. Cost of the CFNPs@Aga aerogel

| Materials                   | Price    | Amount/m <sup>2</sup> | Total Cost               |
|-----------------------------|----------|-----------------------|--------------------------|
| Aga powder                  | 300 ¥/kg | 85.7 g/m <sup>2</sup> | 94.7 ¥/m <sup>2</sup>    |
| Cuttlefish ink <sup>a</sup> | 140 ¥/kg | 2.86 g/m <sup>2</sup> | ~ 13.5 \$/m <sup>2</sup> |
| Ethanol                     | 24 ¥/L   | 1.43 L/m <sup>2</sup> |                          |

<sup>a</sup>The cuttlefish ink used in the experiment was collected from the market for free. The price here refers to an average price of commercial products.



Table S2. Comparison of cost-effectiveness over previous reported solar evaporators

| Reference                                                       | Estimated Total cost (\$/m <sup>2</sup> ) | Evaporation Rate (kg m <sup>-2</sup> h <sup>-1</sup> ) | Cost-effectiveness (Rate/Price, g h <sup>-1</sup> \$ <sup>-1</sup> ) |
|-----------------------------------------------------------------|-------------------------------------------|--------------------------------------------------------|----------------------------------------------------------------------|
| <i>Energy Environ. Sci.</i> <b>2018</b> , 11, 1510.             | 3                                         | 0.6                                                    | 200                                                                  |
| <i>Joule</i> <b>2018</b> , 2, 1331                              | 106.3                                     | 1.62                                                   | 15.2                                                                 |
| <i>ACS Nano</i> <b>2019</b> , 13, 7913                          | 293.21                                    | 3.6                                                    | 12.3                                                                 |
| <i>Joule</i> <b>2018</b> , 2, 1171.                             | 442.39                                    | 2.04                                                   | 4.6                                                                  |
| <i>Mater. Horiz.</i> <b>2018</b> , 5, 1143                      | 41.50                                     | 1.657                                                  | 40                                                                   |
| <i>ACS Nano</i> <b>2017</b> , 11, 5087                          | 16.70                                     | 1.62                                                   | 97                                                                   |
| <i>Proc. Natl. Acad. Sci. U. S. A.</i> <b>2016</b> , 113, 13953 | 20.0                                      | 1.45                                                   | 72.5                                                                 |
| <i>Adv. Mater.</i> <b>2017</b> , 29, 1704107                    | 100                                       | 1.12                                                   | 11.2                                                                 |
| <i>Nat. Commun.</i> <b>2014</b> , 5, 4449                       | 205.07                                    | 1.2                                                    | 5.9                                                                  |
| <i>Adv. Mater.</i> <b>2017</b> , 29, 1702590                    | 124.07                                    | 1.6                                                    | 12.9                                                                 |
| <i>Nat. Commun.</i> <b>2015</b> , 6, 10103                      | 6637                                      | 0.67                                                   | 0.1                                                                  |

|                                                    |       |      |      |
|----------------------------------------------------|-------|------|------|
| <i>Nat. Nanotechnol.</i><br><b>2018</b> , 13, 489  | 98.83 | 3.2  | 32.4 |
| <i>Nat. Photonics</i><br><b>2016</b> , 10, 393     | 6600  | 1.43 | 0.2  |
| <i>Nat. Energy</i><br><b>2016</b> , 1, 16126       | 54    | 0.5  | 9.3  |
| <i>Adv. Mater.</i><br><b>2019</b> , 31,<br>1807716 | 20    | 1.35 | 67.5 |
| <i>Adv. Mater.</i><br><b>2019</b> , 31,<br>1808249 | 190   | 1.5  | 7.9  |
| <i>Adv. Mater.</i><br><b>2015</b> , 27, 4889       | 55    | 0.92 | 16.7 |
| <i>Adv. Mater.</i><br><b>2020</b> , 32,<br>1907061 | 14.9  | 3.2  | 215  |
| Our work                                           | 13.5  | 2.59 | 192  |

The cost of reported works was summarized based on the reference Chem. Eng. J. 2022, 427, 130905.

Table S3. Degradability of the CFNPs@Aga aerogel in soil

| Sample                      | 1      | 2      | 3      |
|-----------------------------|--------|--------|--------|
| Weight on Day 0/g           | 0.0276 | 0.0315 | 0.0251 |
| Weight on Day 14/g          | 0.0237 | 0.0279 | 0.0208 |
| Degradation efficiency (DE) | 14.1%  | 11.4%  | 17.1%  |
| Average DE                  |        | 14.2%  |        |
